1 Familial Alzheimer's disease mutation undermines axonal transport  
2 by enhancing dynactin recruitment to the APP motor assemblies

3  
4 Monica Feole<sup>1</sup>, Gorazd B. Stokin<sup>1,2,3\*</sup>

5  
6 <sup>1</sup> Translational Ageing and Neuroscience Program, Centre for Translational Medicine,  
7 International Clinical Research Centre, St. Anne's University Hospital, Brno, Czech  
8 Republic

9 <sup>2</sup> Division of Neurology, University Medical Centre, Ljubljana, Slovenia

10 <sup>3</sup> Department of Neurosciences, Mayo Clinic, Rochester, MN, USA.

11  
12  
13 \*Corresponding author e-mail: [gbstokin@alumni.ucsd.edu](mailto:gbstokin@alumni.ucsd.edu) (G.B.S.)

1  
2  
3  
4  
5  
6  
7  
8  
9  
10  
11  
12  
13  
14  
15  
16  
17  
18  
19  
20  
21  
22  
23  
24  
25  
26  
27  
28  
29  
30  
31  
32

## ABSTRACT

Experiments in flies, mice and humans suggest a significant role of impaired axonal transport in the pathogenesis of Alzheimer’s disease (AD), however, the underlying mechanisms remain unknown<sup>1,2</sup>. We report that the Swedish familial AD (FAD) mutation perturbs fast anterograde axonal transport of the amyloid precursor protein (APP) by altering directionality of its movement. APP thus spends more time in retrograde movement and accumulates in the soma. We found that the Swedish mutation enhances recruitment of dynactin 1 to the APP transport assemblies. Given that dynactin 1 activates the retrograde motor dynein<sup>3</sup>, this hampers physiological anterograde axonal transport of APP. We last show that the Swedish mutation perturbs also the axonal transport of early endosomes, which rely on the same molecular motors as APP. Our findings reveal extensive impairment of the axonal transport pathways by a FAD mutation, which reflects dysregulation of the cargo motor assemblies.

**Keywords:** familial Alzheimer’s disease mutations, amyloid precursor protein, axonal transport, dynactin 1, early endosomes

1  
2  
3  
4  
5  
6  
7  
8  
9  
10  
11  
12  
13  
14  
15  
16  
17  
18  
19  
20  
21  
22  
23  
24  
25  
26  
27  
28  
29  
30  
31  
32

## INTRODUCTION

The APP is a type I integral membrane protein active at synapses<sup>4</sup> and best known for its role in the amyloid pathology and pathogenesis of AD<sup>5</sup>. In fact, autosomal dominant mutations in APP have long been identified to segregate with kindreds afflicted by AD<sup>6</sup>. Although exceptionally rare, these familial AD (FAD) mutations play an invaluable role in elucidating mechanisms underlying the pathogenesis of AD. For example, the APP KM670/671NL Swedish double mutation promotes  $\beta$ -cleavage of APP at the N-terminus of its amyloid- $\beta$  peptide (A $\beta$ ) sequence<sup>7</sup>. This cleavage enhances formation of  $\beta$ -cleaved APP C-terminal fragments ( $\beta$ -CTFs), which are subject to  $\gamma$ -cleavage at the C-terminus of the A $\beta$  sequence and release excess of A $\beta$ <sup>8,9</sup>. Other FAD mutations, such as the APP V717I London mutation, promote  $\gamma$  rather than  $\beta$ -cleavage and also release excess of A $\beta$ <sup>10,11</sup>. Aberrant A $\beta$  production spearheads the amyloid cascade hypothesis, which postulates that A $\beta$  ignite and drive AD pathogenesis<sup>12</sup>. FAD mutations, however, increase also  $\beta$ -CTFs levels and enlarge early endosomes, which suggests that mechanisms of perturbed intracellular sorting and degradation are likewise at play in the pathogenesis of AD<sup>13,14</sup>.

In axons, APP undergoes fast anterograde transport<sup>15</sup> and proteolytic cleavage into  $\beta$ -CTFs and A $\beta$ <sup>16</sup>. Although interactions between the components of the APP motor assemblies remain to be further elucidated<sup>17,18</sup>, a number of studies reports that APP

1 vesicles move within the axons by highly processive molecular motors, kinesin-1 in the  
2 anterograde and dynein-dynactin complex in the retrograde direction<sup>19-21</sup>. Studies in  
3 animal models and patients afflicted by AD point to a role of axonal transport and  
4 pathology in the pathogenesis of AD and suggest that FAD mutations perturb axonal  
5 transport<sup>22-26</sup>. These studies gain further support from cell culture experiments, which  
6 demonstrate that FAD mutations reduce proportion of anterogradely transported APP<sup>27</sup>.  
7 However, changes in transport behaviour of the cargoes and in the processivity of  
8 molecular motors that would instruct about mechanisms underlying putative transport  
9 disruption by FAD mutations remain unknown. We here rigorously characterize the effects  
10 of FAD mutations on axonal transport and provide an insight into the mechanisms by which  
11 FAD mutations impair axonal transport.

12

13

14

15

16

17

18

## 19 RESULTS

### 20 FAD mutations impair anterograde axonal transport of APP in human neurons

21 To investigate the impact of FAD mutations on APP transport, we first recreated previously  
22 reported experimental settings using human neurons<sup>27,28</sup>. Neurons were transfected with  
23 either wildtype APP (APP<sub>wt</sub>) or APP harbouring Swedish (APP<sub>swe</sub>) or London (APP<sub>lon</sub>)  
24 mutations, linked to Green Fluorescent Protein (GFP). Two days following transfection,  
25 movies of APP transport were acquired from distal neuronal projections (Movies S1-3).  
26 APP<sub>swe</sub> and APP<sub>lon</sub> exhibited significant reduction in the proportion of anterogradely  
27 transported particles compared to APP<sub>wt</sub> (Fig. S1a-c).

28 To delve into mechanisms underlying the observed impairment in transport by FAD  
29 mutations, we focused on the Swedish mutation and first established its overall effect on  
30 the axonal transport of APP. Neurons were grown for 40 DIV in ibidi multichannel devices  
31 and then transduced with either APP<sub>wt</sub>, linked to GFP, or APP<sub>swe</sub> linked to Red Fluorescent  
32 Protein (tRFP) (Fig. 1a). Ten days following transduction, movies of APP transport were

1 acquired from distal neuronal projections. Neuronal cultures were then stained for axonal  
2 ( $\rho$ NFH) and dendritic markers (MAP2) (Fig. 1b). Using position retrieval, we selected for  
3 further analysis only those movies of APP transport in the distal projections that stained  
4 with the axonal marker (Fig. 1c, Movies S4 and 5). Semi-automated tracking algorithm  
5 was then employed to measure net movement of APP. Measurements showed significant  
6 reduction in the proportion of anterogradely transported APP<sub>swe</sub> compared with the APP<sub>wt</sub>  
7 particles with no differences in the number of tracks (Fig. 1d-f, Movies S6 and 7). This  
8 reduction was accompanied by significant increase in the stationary APP<sub>swe</sub> particles.  
9 APP<sub>swe</sub> also showed significant decrease in anterograde, but not retrograde, average  
10 velocity of axonal transport compared with APP<sub>wt</sub> (Fig.1g).

11 To confirm that the observed transport behaviour of APP<sub>swe</sub> is indeed of exclusively axonal  
12 nature, we validated our results also in microfluidic chambers (Fig. S1d, e). In conclusion,  
13 by employing several experimental paradigms designed to examine exclusively axonal  
14 transport, we demonstrate that the Swedish mutation impairs axonal transport of APP.

15

### 16 **Swedish mutation perturbs processivity of APP motor assemblies**

17 To establish the precise behavioral changes in APP transport caused by the Swedish  
18 mutation, we performed an in-depth analysis of the movement of APP particles in axons  
19 (Fig. 2a). Segmental analysis showed a significant increase in the percentage of APP<sub>swe</sub>  
20 particles in retrograde motion accompanied by their decrease in anterograde motion  
21 compared to APP<sub>wt</sub>, while pausing time remained unchanged (Fig. 2b). Intriguingly, only  
22 distances of APP<sub>swe</sub> particles moving toward the presynaptic terminals, but not toward cell  
23 bodies, were shorter compared with APP<sub>wt</sub> (Fig. 2c, Fig. S2a).

24 In light of the overall reduced anterograde transport and distances and to better  
25 characterise the increased time spent in retrograde motion, we next investigated  
26 directionality of APP transport. Frequencies of reversions between anterograde and  
27 retrograde movement direction were significantly increased in APP<sub>swe</sub> particles overall as  
28 well as in anterograde and retrograde tracks compared with APP<sub>wt</sub> (Fig. 2d, S2b). On the  
29 other hand, pauses frequency, defined as the number of pauses which particles  
30 experience during their journey along the axon, showed significant increase only in the  
31 anterogradely transported APP<sub>swe</sub> particles with no overall changes between APP<sub>wt</sub> and  
32 APP<sub>swe</sub> (Fig. 2e, S2c).

1 Increased pauses frequency in the anterogradely transported APP<sub>swe</sub> particles, together  
2 with reduced anterograde transport, shorter track lengths and enhanced reversions, led  
3 us to next examine segmental velocities. Cumulative distribution analysis showed  
4 significantly reduced anterograde as well as retrograde segmental velocities of APP<sub>swe</sub>  
5 compared with APP<sub>wt</sub> particles (Fig. 2f). Reduction in segmental velocities was greater in  
6 anterograde (app. 0.3  $\mu\text{m/s}$ ) than in the retrograde direction (app. 0.15  $\mu\text{m/s}$ , Fig. S2d).  
7 The above described behaviour of APP<sub>swe</sub>, characterized by bi-directionality of the  
8 transport due to accentuated retrograde movement, is indicative of the Swedish mutation  
9 perturbing processivity of the APP motor assemblies.

10

### 11 **Enhanced localization of APP carrying Swedish mutation in the soma**

12 The observed predominantly anterograde impairment of axonal APP transport triggered  
13 by the Swedish mutation raises the question of whether APP accumulates in the cell  
14 bodies. To address this question, 40 DIV human neurons were fixed and stained for either  
15 GFP or tRFP, which mark APP<sub>wt</sub> and APP<sub>swe</sub>, respectively, as well as with Tau to compare  
16 intensities between cell bodies and neurites (Fig.3a, b). APP<sub>swe</sub> demonstrated significantly  
17 increased ratio of cell body *versus* neurite intensities compared with APP<sub>wt</sub> (Fig. 3c). In  
18 contrast, there were no changes in the cell body to neurite Tau ratios in both APP<sub>wt</sub>-GFP  
19 and APP<sub>swe</sub>-tRFP transduced cell cultures (Fig. 3d). Our findings indicate that impaired  
20 anterograde axonal transport of APP by the Swedish mutation causes accumulation of  
21 APP in the cell bodies.

22

### 23 **Swedish mutation enhances recruitment of dynactin 1 to the APP motor assemblies**

24 Evidence of perturbed processivity of APP motor assemblies by the Swedish mutation is  
25 suggestive of impaired coordination of APP movement by the molecular motors. To test  
26 for changes in the interaction between the components of the APP motor assemblies, we  
27 transduced 20 DIV SH-SY5Y cells with either APP<sub>wt</sub> or APP<sub>swe</sub>. Cell lysates were next  
28 immunoprecipitated (IP-ed) with either GFP or tRFP, which tag APP<sub>wt</sub> and APP<sub>swe</sub>,  
29 respectively, and separated on SDS-PAGE. The blots were then probed for detection of  
30 APP, kinesin light chain 1 (KLC1) and dynactin 1 (DCTN1) (Fig. 4a, S3a). The ratio of  
31 intensities between APP and DCTN1, but not KLC1, significantly increased in lysates from  
32 cells expressing APP<sub>swe</sub>-tRFP compared with APP<sub>wt</sub>-GFP (Fig.4b). Considering the same

1 membranes re-blotted for either GFP or tRFP recognized exclusively over-expressed APP,  
2 while IP of non-transduced (NT) cultures showed no binding with antibodies against GFP  
3 or tRFP, our results demonstrate that the increased ratio of intensities between APP and  
4 DCTN1 is the consequence of the Swedish mutation (Fig.S3b and c).

5 To test further for enhanced recruitment of DCTN1 to APP motor assemblies, we IP-ed  
6 SH-SY5Y cell lysates with DCTN1 and probed the blots with antibody against APP (Fig.4c,  
7 S3d). We found significantly increased ratio of intensities between DCTN1 and APP in cells  
8 transduced with APP<sub>swe</sub> compared with APP<sub>wt</sub> (Fig.4d). Collectively, these experiments  
9 show that Swedish mutation enhances recruitment of DCTN1 to the APP vesicles.  
10 Considering DCTN1 plays a role in activating dynein<sup>3</sup> our findings suggest increased  
11 activation and processivity of the dynein-dynactin complex. (Fig.4e).

12

### 13 **Swedish mutation promotes anterograde axonal transport of early endosomes**

14 Considering molecular motors multitask in transporting several cargoes along the axons,  
15 we asked whether enhanced recruitment of DCTN1 to APP assemblies perturbs axonal  
16 transport of other cargoes driven by the same motors. To this end, we selected to study  
17 early endosomes since they are transported by the same molecular motors as APP and  
18 participate in the pathophysiology of AD<sup>29</sup>. To first reproduce the previously reported  
19 phenotype of increased size of Rab5 positive (Rab5+) endosomes in human induced  
20 pluripotent cell lines carrying FAD mutations<sup>13,30</sup>, we transduced human neurons with  
21 APP<sub>swe</sub> and stained for Rab5 and tRFP to acquire high-resolution images of neurons  
22 expressing APP<sub>swe</sub> (Fig. 5a). Neurons expressing APP<sub>swe</sub> showed a significant increase in  
23 size of the area occupied by the Rab5+ particles with reduced frequency of endosomes  
24 with areas  $\leq 0.5 \mu\text{m}^2$  and increased frequency of endosomes with areas  $\geq 0.5 \mu\text{m}^2$   
25 compared with NT cultures (Fig. S4a).

26 We next examined the effects of the FAD Swedish mutation on the axonal transport of  
27 Rab5+ endosomes. Neurons were co-transduced either with APP<sub>wt</sub>/Rab5-RFP or with  
28 APP<sub>swe</sub>/Rab5-EGFP and axonal Rab5 transport examined. There were no differences in  
29 the number of Rab5-RFP or Rab5-EGFP tracks in any of the transduction combinations  
30 (Fig. S4b, S5a). Comparison of neurons transduced with Rab5-RFP or with Rab5-  
31 RFP/APP<sub>wt</sub> also showed no differences in the axonal Rab5-RFP transport in any of the  
32 examined parameters performing either net or segmental axonal transport analyses (Fig.

1 S5b-f). In contrast, neurons transduced with Rab5-EGFP/APP<sub>swe</sub> showed significantly  
2 increased anterograde motion of Rab5 particles compared with Rab5-EGFP transduced  
3 neurons with comparable Rab5 track lengths (Fig. 5b, c, S4c). These findings were  
4 accompanied by significantly increased frequency of reversions, but not of pauses  
5 frequency, in Rab5-EGFP/APP<sub>swe</sub> compared with Rab5-EGFP transduced neurons (Fig.  
6 5d, e). Segmental velocities of anterogradely, but not retrogradely, moving Rab5 particles  
7 were also significantly increased by APP<sub>swe</sub> co-transduction (Fig. 5f, S4d).

8 Considering the Swedish mutation increased anterograde transport of Rab5+ endosomes,  
9 we last investigated whether it also increases their density in distal projections. We  
10 observed significantly increased number of Rab5+ particles in APP<sub>swe</sub> *versus* NT distal  
11 projections (Fig. 5g). These experiments indicate that the Swedish mutation impairs  
12 axonal transport of not only APP, but also of other cargoes.

13

14

15

16

17

18

19

20

21

22

23

24

25

26

27

28

29

30

31

32



1  
2  
3  
4  
5  
6  
7  
8  
9  
10  
11  
12  
13  
14  
15  
16  
17  
18  
19  
20  
21  
22  
23  
24  
25  
26  
27  
28  
29  
30  
31

## DISCUSSION

Accumulating evidence suggests that impairments in axonal transport by FAD mutations of APP contribute to the pathogenesis of AD. Animal models carrying different FAD mutations showed decreased levels of APP at the proximal stump of ligated sciatic nerves and reduced  $Mn^{2+}$  and radiolabelled NGF transport in the hippocamposeptal pathway<sup>25,26,31,32</sup>. These observations indicate a role of FAD mutations in axonal transport, however, lack direct comparison between wildtype and FAD mutant APP overexpression. Consistent with these findings, cell culture experiments carrying different FAD mutations, expressing  $\beta$ CTFs or blocking  $\beta$ - and  $\gamma$ -cleavage sites of APP by genetic or pharmacological means all revealed perturbed axonal transport<sup>27,33</sup>.

We here build from these studies and characterize the axonal behaviour of APP transport elicited by the Swedish mutation, which acquires typical features of bi-directional movement. This behaviour consists of reduced anterogradely transported APP particles with slower velocities, shorter track lengths and frequent pauses, concomitant increased reversals, and time in retrograde motion. Such axonal transport behaviour is reminiscent of perturbed processivity of cargo motor assemblies<sup>34,35</sup> and prompted us to investigate the interactions between APP and molecular motors. We found that the Swedish mutation enhances recruitment of DCTN1 to the APP motor assemblies. Considering DCTN1 is fundamental for processive motility of the retrograde motor dynein<sup>3</sup>, our finding suggests that by recruiting more DCTN1 to the APP motor assemblies, the Swedish mutation activates retrograde machinery, perturbing the physiologically predominant anterograde transport of APP. Moreover, changes in transport behaviour of Rab5 positive early endosomes indicate that the Swedish mutation perturbs axonal transport at different levels<sup>36</sup>. The ultimate impact of the Swedish mutation is therefore a switch in the directionality of axonal transport with APP accumulating in the cell bodies and early endosomes in distal projections. Whether accumulation of Rab5+ endosomes in distal projections, which prevents their natural maturation within the endosomal-lysosomal

1 system, plays a role in their enlargement and malfunction in AD awaits further  
2 experimentation.

3 Our findings fuel the hypothesis that impairments in axonal transport underlie the axonal  
4 pathology and pathogenesis of AD<sup>1,2,37,38</sup>. Genetic manipulation of APP<sup>24</sup>, its proteolytic  
5 machinery<sup>22,25,39</sup> and of all other major proteins linked to AD including tau<sup>40,41</sup> and ApoE<sup>42</sup>  
6 in flies and mice produces invariably axonal pathology reminiscent of the one described in  
7 molecular motor deficiencies<sup>43</sup>. These previous studies, together with our findings,  
8 suggest that perturbed processivity of molecular motors underlies axonal transport  
9 defects and ultimately translates into axonal pathology in AD. This hypothesis is further  
10 strengthened by the recently observed KLC1 abnormalities in the brains of patients with  
11 sporadic AD<sup>44-46</sup>, which suggest that besides FAD in cargos, molecular motors also play a  
12 role in axonal transport impairments. The discovery of extensively compromised axonal  
13 transport pathways is directly relevant to understand not only the pathogenesis of AD, but  
14 also of other neurodegenerative disorders.

15  
16  
17  
18  
19  
20  
21  
22  
23  
24  
25  
26  
27  
28  
29  
30  
31  
32

1  
2  
3  
4  
5  
6  
7  
8  
9  
10  
11  
12  
13  
14  
15  
16  
17  
18  
19  
20  
21  
22  
23  
24  
25  
26  
27  
28  
29  
30  
31

## MATERIALS AND METHODS

### Human neuronal differentiation

Human Neural Stem Cells (hNSCs) derived from the NIH approved H9 (WA09) human embryonic stem cell line were purchased from Merck (Germany). The hNSCs were plated on matrigel-coated 100 mm petri dishes and maintained in culture with NSCs expansion media (KO DMEM/F12, 2% StemPro Neural Supplement, 1% Glutamax, 20 ng/ml  $\beta$ -FGF, 20 ng/ml EGF), which was exchanged every second day (DIV0-3). Upon reaching confluency, the cells were grown in the neural progenitors differentiation media (DMEM/F12, 1% B27, 0.5% N2, 1% Glutamax), which was exchanged every other day until DIV9. Neural progenitors were then detached and centrifuged at 300xg for 5' at RT and pellets resuspended in proper Neuronal Optimized Media complete (NOMc) (DMEM-F12, 2% B27, 1% N2, 1  $\mu$ g/ml laminin, 100 nM cAMP, 200 ng/ml ascorbic acid, 10 ng/ml BDNF, 10 ng/ml GDNF, 10 ng/ml IGF). Cells were counted and then seeded at different densities depending on the experimental needs. Neurons were differentiated by changing the NOMc every 6 days up to DIV40.

1

## 2 **Human SHSY-5Y differentiation into neuron-like population**

3 SH-SY5Y (ATCC, USA) cells can be differentiated from a neuroblastoma-like state into a  
4 human neuronal-like cell culture. Indeed, for our experiments, we decided to differentiate  
5 the cells by applying an adaptation of a well established differentiation protocol (Shipley,  
6 M. et al., 2016.).

7 SH-SY5Y were seeded into 60 mm petri dishes previously coated for 15 min with 0.1 %  
8 Gelatin/PBS. Cells were maintained in DMEM complete (DMEM-high glucose, 10% Fetal  
9 Bovine Serum, 1% P/S) up to 80% confluency (DIV 0-2). Afterwards, cells were passed  
10 into new 60 mm dishes and culture medium switched to serum-free Optimem containing  
11 1% B27, 10 ng/ml BDNF, 10 ng/ml cAMP, 10 $\mu$ M RA, 1% P/S, 1% Glutamax, and changed  
12 every second day up to DIV 20, when the cells were used for experiments.

13

## 14 **Microfluidic chambers**

15 The microfluidic chambers (Xona Microfluidics LLC, CA, USA) were cleaned with 100%  
16 ethanol and glass coverslips coated overnight at 37°C with a poly-ornithine solution (0.1  
17 mg/ml in PBS). The day after, coverslips and microfluidic chambers were bonded, and the  
18 reservoirs filled with PBS to avoid bubble formation. After an hour, PBS was removed and  
19 matrigel added in all the reservoirs to fully coat both neuronal and axonal compartments.  
20 Chambers were maintained in the incubator at 37°C in 5% CO<sub>2</sub> for at least 1h. Immediately  
21 before seeding, matrigel was removed and NPCs seeded in the top well of the neuronal  
22 compartment (300000 cells/50  $\mu$ l in NOMc). Chambers were then placed into the  
23 incubator for 30 min, after which the wells were topped up with NOMc. Cultures were  
24 maintained by changing media every 6 days and equilibrated every 3 days to compensate  
25 for evaporation. DIV40 axons crossed completely the axonal compartment.

26

## 27 **Lentiviral vectors**

28 LV-APP<sub>wt</sub>\_GFP, LV-APP<sub>swe</sub>\_tRFP and LV-GFP\_Rab5 were designed to be expressed under  
29 human synapsin 1 promoter. Cloning and packaging were performed by Flash  
30 Therapeutics (France) and Vector builder (VectorBuilder Inc., IL, USA) for APP<sub>wt</sub> and  
31 APP<sub>swe</sub>, and Rab5, respectively. The CellLight™ Early Endosomes-RFP, BacMam 2.0  
32 expressing Rab5 was used according to manufacturer's instructions (Thermo Fisher).

1

## 2 **Transduction**

3 Human Neurons or SHSY-5Y cells were transduced with lentiviral particles at DIV17 and  
4 DIV9, respectively. Particles were retrieved from -80°C and slowly thawed on ice for 20  
5 min. Afterwards, specific volumes of LVs were resuspended in NOMc media according to  
6 the validated M.O.I. and TU/ml provided by the manufacturer. The transduction was  
7 performed by replacing media with either NOMc or Optimem-containing lentiviral particles  
8 for approximately 24h. Solutions containing lentiviral particles were then replaced by fresh  
9 media. Transduction levels were checked every 48 h until the start of the experiments.

10

## 11 **Live imaging and tracking**

12 Movies of axonal transport of APP<sub>wt</sub>\_GFP, APP<sub>swe</sub>\_tRFP, GFP\_Rab5 and RFP\_Rab5 were  
13 acquired and analyzed using the same protocol. Movies were acquired at 2fps using a  
14 confocal microscope equipped with a live module (Zeiss Confocal LSM780, Zeiss Live  
15 LSM7) and an immersion oil objective 63x/1.4 NA Plan Apochromat. Time-lapse movies  
16 were processed with ImageJ prior to the analysis in Imaris (version 9.2, Oxford  
17 Instruments). Particles were tracked with the semi-automated spot tracking algorithm and  
18 visualized during the whole period of the movie.

19 For the analysis, we were first asked to choose which algorithm would better define the  
20 behaviour of our cargoes. Considering that studied cargoes all exhibit an almost continuous  
21 movement, we applied the Autoregressive Motion algorithm. The algorithm required the  
22 input of the following parameters: XY estimated diameter, max distance, and max gap  
23 size. Diameter was based on an average empirical value for each specific cargo analyzed.  
24 For either max distance or max gap size, both spatial and temporal resolutions of the  
25 acquired movies were taken into account. Among all the statistical values obtained, the  
26 most significant one was the spatial displacement ( $\Delta D_x(t_1, t_0) = P_x(t_1) - P_x(t_0)$ ) of the  
27 particles in each frame and the track duration (td=total time during which a particle  
28 moves), which were both exported for further computation of axonal transport parameters.  
29 For transport dynamics analysis, we first divided the tracks into stationary or moving. All  
30 the tracks moving at < 10s were excluded. In the net axonal transport analysis, tracks with  
31 average velocities <0.10  $\mu\text{m/s}$  were defined as stationary. All the other tracks were  
32 classified as moving in anterograde or retrograde direction if the average velocities were

1 > 0.01  $\mu\text{m/s}$  or < - 0.01  $\mu\text{m/s}$ , respectively. In the segmental axonal transport analysis, we  
2 used the  $\Delta x$  displacement between frames to compute instantaneous changes in  
3 movement: pauses frequency, reversions, segmental velocities and real-time movement.  
4 Finally, since the software allows calculating the distance along each vector (x and y) of  
5 the particle's movement, the total distances run by the particles were shown as track  
6 lengths.

7

## 8 **Immunocytochemistry**

9 Neurons differentiated either in microfluidic or ibidi chambers (6 channels or 8 multi well-  
10 8mw) were fixed in 4% paraformaldehyde (PFA)/ 4% Sucrose for 1h or 40 min,  
11 respectively. Incubation with 0.1M Glycine for 5 min was used to quench the fixation. After  
12 that, cells were permeabilized with 0.1% Tryton X-100 for 10 min. Samples were blocked  
13 with 5% BSA for 30 min and then incubated overnight at 4°C with primary antibodies in  
14 3% BSA. The second day, the cells were incubated with secondary antibodies in 3% BSA  
15 for 2h. Finally, cells were stained with DAPI for 3 min, then washed with ddH<sub>2</sub>O and  
16 mounted either with 50% Glycerol in 0.01% Na azide/PBS (ibidi 6 channels) or with Mowiol  
17 (ibidi 8mw and coverslips). Samples were dried and then stored at 4°C.

18

## 19 **Confocal imaging**

20 Fixed cells were examined either with an inverted Zeiss LSM 780 confocal microscope  
21 (Zeiss, Germany) or with a Leica DM 6000B (Leica Microsystems, Germany) using an oil  
22 immersion objective (63X/1.4 NA plan Apochromat). Z-stacks were acquired for the MAP2  
23 and pNFH imaging analyses in both ibidi and microfluidic chambers. For APP<sub>wt</sub> *versus*  
24 APP<sub>swe</sub> localization, z-stacks in tile-scan mode were acquired to image APP distribution in  
25 whole neurons. To define Rab5 particle sizes, a Lightning module (Leica microsystems)  
26 was used to deconvolve z-stacks and improve particle resolution for an unbiased analysis  
27 of the puncta size.

28

## 29 **Identification of the axonal nature of the neurites**

30 ibidi  $\mu$ -Slides VI <sup>0.4</sup> were used to perform part of the transport experiments for both  
31 APP<sub>wt</sub>\_GFP and APP<sub>swe</sub>\_tRFP. Differently from the microfluidic chambers, the ibidi device  
32 lacks a physical division between the neuronal and axonal compartments. For this reason,

1 prior to seeding the neurons, the ibidi were marked with an arbitrary reference point to set  
2 an X; Y (0;0), this was then matched with the 0;0 of the confocal stage prior to time-lapse  
3 acquisition. While acquiring movies, each selected projection was marked into a position  
4 list and saved. Post-live imaging cells were used for immunocytochemistry, following the  
5 protocol described above, and positions retrieved to identify exclusively pNFH(+) neurites,  
6 which were included into the axonal transport analysis.

7

## 8 **Image analysis**

9 Images acquired from immunocytochemistry were analyzed either with ImageJ or Imaris.

10 (i) MAP2/pNFH characterization in human neurons: from 40 z-stacks acquired per each  
11 different biological replicate (n=3), 20 images were randomly selected for further ratio  
12 analysis. Among the 20 pictures, 5 randomly selected neurites, either MAP2-(+) or pNFH-  
13 (+) were selected in each channel and intensities measured to compare the ratios among  
14 all the samples.

15 (ii) pNFH-GFP/tRFP post-live imaging: neurites were traced in ImageJ following GFP or  
16 tRFP intensities for APP<sub>wt</sub>\_GFP and APP<sub>swe</sub>\_tRFP, respectively. Intensity profiles of APP  
17 were matched with those of pNFH to either include or exclude the neurite from further  
18 axonal transport analysis.

19 (iii) APP localization: ROIs were traced for both cell bodies and neurites to measure either  
20 APP or Tau intensities. Tau was used as a reference marker to study both APP<sub>wt</sub> and  
21 APP<sub>swe</sub>. Afterwards, ratios of APP in soma/axon were measured and normalized for Tau  
22 intensity. With the same approach, Tau levels in both APP<sub>wt</sub> and APP<sub>swe</sub> were compared  
23 by quantifying the soma/axon ratios.

24 (iv) Rab5 size and densities: Rab5 puncta areas were measured in deconvolved z-stacks.  
25 Tau was used as a mask. When transduced with APP<sub>swe</sub>, only those cells that were  
26 overexpressing mutant APP were used to measure Rab5 sizes. Masked images were  
27 analyzed in Rab5 channel by the Analyze particles tool from ImageJ to determine the area  
28 of the puncta in the whole neuron, and their densities in distal projections.

29

## 30 **Protein extraction**

31 For Immunoprecipitations (IPs), proteins from differentiated SHSY-5Y cells, Non-  
32 Transduced (NT) or transduced with either APP<sub>wt</sub>\_GFP or APP<sub>swe</sub>\_tRFP, were collected

1 with the IP lysis buffer (1% Nonidet – P40, 25 mM Tris buffer pH 7.4, 150 mM NaCl, 1mM  
2 EDTA, 5% Glycerol). Cells were incubated for 30 min on ice and cell membranes disrupted  
3 using an insulin syringe. Supernatants were collected into new tubes following  
4 centrifugation for 20 min at 20000xg 4°C. Total lysates were quantified using the BCA  
5 assay (Pierce™ BCA Protein Assay Kit, Thermo Fisher).

6

## 7 **Immunoprecipitations**

8 Target proteins were immunoprecipitated either with GFP- or RFP-trap Magnetic Agarose  
9 beads (Chromotek, Proteintech) or with Dynabeads Protein G (Thermo Fisher), which  
10 both allow magnetic separation of target proteins. GFP or RFP-trap were used to IP  
11 APP<sub>wt</sub>\_GFP and APP<sub>swe</sub>\_tRFP, respectively. Prior to the addition of proteins, beads were  
12 equilibrated with 500 µl of Dilution buffer (10 mM Tris/Cl pH 7.5, 150 mM NaCl, 0.5 mM  
13 EDTA, 0.018% Na azide) as instructed by the manufacturer's protocol. 1 mg of proteins  
14 was used per each IP. Beads were used at 50 µl/mg of total lysate for both GFP and RFP  
15 trap and samples incubated for 2h at 4°C rotating end-over-end. Tubes were spun at  
16 1000xg for 1 min and then placed into DynaMag-2 (Thermo Fisher) for separation of flow-  
17 through fractions. The beads were washed twice for 2 min with 500µl/wash buffer (150  
18 mM NaCl, 50 mM Tris/Cl pH 7.5). Protein complexes were eluted using 1X LDS sample  
19 buffer, 1X NuPage DTT reducing agent (Thermo Fisher) and heated at max 80°C for 15  
20 min. Eluates were last saved into new tubes for SDS-PAGE and WB blot analysis.

21 For IP of DCTN1, 50µl of Dynabeads Protein G were used per sample. The beads were  
22 freed from storing solution by magnetic separation and then the antibody conjugation  
23 performed by adding 200µl of the Ab Binding Buffer (Thermo Fisher), and 5 µg of DCTN1  
24 antibody. The mix was incubated for 1h rotating end-over-end at 4°C. Ab Binding Buffer  
25 was then discarded and 1mg of total lysate added to the beads. Incubation, washes, and  
26 elution were performed as above (washes were made in this case by using just 200 µl of  
27 Wash Buffer).

28

## 29 **SDS-PAGE and Western blotting**

30 Quantified protein samples were loaded into Bolt Bis-Tris Plus 4-12 % precast gels  
31 (Novex, Thermo Fisher) and SDS-PAGE performed first for 10 min at 50V and then at  
32 110V for 1h 30 min. Proteins were then transferred onto PVDF membranes (Thermo



1 Flsher) using a Mini blot module (Invitrogen) for 1h 50 min at 30V. Membranes were  
2 washed 3 X 5 min with 20mM Tris-Buffer (TBS) and blocked in 5% non-fat dry milk (NFDM)  
3 in 20mM TBS/0.2% Tween-20 (TBS-T) for 1h at RT. After 3 washes in TBS, the  
4 membranes were probed overnight at 4°C with primary antibodies listed below in 1% BSA  
5 in TBS-T. The second day, HRP-conjugated antibodies were prepared in 1% NFDM TBS-  
6 T and incubated for 2h at 4°C. Last, the membranes were washed 3 X 5 min with TBS-T  
7 and proteins detected using Chemiluminescent Substrate (SuperSignal™ West Pico  
8 PLUS, Thermo Scientific) by acquiring images with Chemidoc (BioRad).

### 9 **Antibodies**

10 The following antibodies were used for immunocytochemistry: MAP2 (1:3000, Abcam  
11 221693), pNFH (mouse 1:2000, BioLegend 801601). TurboRFP (1:1000, Evrogen  
12 AB233), GFP (1:1000, abcam 5450), Tau (1:400, abcam 62639) and Rab5 (mouse  
13 1:1000, Cell Signaling 46449). For IP and blots we used APP (1:1000, Abcam ab126732),  
14 KLC1 (1:1000, Abcam 174273), DCTN1 (mouse 1:200 Santa Cruz 135890, rabbit 1:1000  
15 or 1:50 Cell signaling 69399) and  $\beta$  III-tubulin (1:6000 Biolegend 802001). Secondary  
16 antibodies used for immunocytochemistry were donkey anti-mouse/rabbit/goat/sheep  
17 conjugated to Alexa Fluor 488/546/555/647 (Invitrogen 1:500), respectively. For  
18 immunoblotting, antibodies conjugated with HRP were used: anti-Rabbit 1:2000 (Cell  
19 signaling 7074), anti-Mouse 1:2000 (Cell signaling 7076), anti-Goat 1:1000 (Santa Cruz  
20 2354), and Clean-Blot™ IP Detection Reagent 1:200 (Thermo Scientific 21230).

21

### 22 **Statistical analysis**

23 All the analyses were performed by using GraphPad Prism 9.4.0. Statistical tests are  
24 described in detail in figure legends.

25

26

27

28

1 **ACKNOWLEDGEMENTS**

2 We thank members of the Stokin Lab for support and feedback. Among all we thank in  
3 particular Dr. V.M. Pozo Devoto for data analyses and N. Dragišić for assisting with cell  
4 cultures.

5

6 **AUTHORS CONTRIBUTIONS**

7 Conceptualization, M.F. and G.B.S.; Methodology, M.F. and G.B.S.; Investigation, M.F.; Formal  
8 Analysis, M.F.; Data Curation, M.F. and G.B.S.; Writing, M.F. and G.B.S.; Supervision, G.B.S.;  
9 Project Administration, G.B.S.; Funding Acquisition, G.B.S.

10

11 **COMPETING INTERESTS**

12 The authors declare no competing interests.

13

14 **FUNDING**

15 This work was supported by the European Regional Development Fund – Project Magnet  
16 No. CZ.02.1.01/0.0/0.0./15\_003/0000492 and by the European Regional Development  
17 Funds No. CZ.02.1.01/0.0/0.0/16\_019/0000868 ENOCH.

18

19

20

21

22

23

24

25

26

27

28

29

30

31

32

1  
2  
3  
4  
5  
6  
7  
8  
9

## REFERENCES

- 10 1 Terry, R. D. The pathogenesis of Alzheimer disease: an alternative to the amyloid hypothesis. *J*  
11 *Neuropathol Exp Neurol* **55**, 1023-1025 (1996).
- 12 2 Stokin, G. B. & Goldstein, L. S. Axonal transport and Alzheimer's disease. *Annu Rev Biochem* **75**,  
13 607-627, doi:10.1146/annurev.biochem.75.103004.142637 (2006).
- 14 3 McKenney, R. J., Huynh, W., Tanenbaum, M. E., Bhabha, G. & Vale, R. D. Activation of  
15 cytoplasmic dynein motility by dynactin-cargo adapter complexes. *Science* **345**, 337-341,  
16 doi:10.1126/science.1254198 (2014).
- 17 4 Schubert, D., Schroeder, R., LaCorbiere, M., Saitoh, T. & Cole, G. Amyloid beta protein  
18 precursor is possibly a heparan sulfate proteoglycan core protein. *Science* **241**, 223-226,  
19 doi:10.1126/science.2968652 (1988).
- 20 5 Masters, C. L. & Selkoe, D. J. Biochemistry of amyloid beta-protein and amyloid deposits in  
21 Alzheimer disease. *Cold Spring Harb Perspect Med* **2**, a006262,  
22 doi:10.1101/cshperspect.a006262 (2012).
- 23 6 Lanoiselee, H. M. *et al.* APP, PSEN1, and PSEN2 mutations in early-onset Alzheimer disease: A  
24 genetic screening study of familial and sporadic cases. *PLoS Med* **14**, e1002270,  
25 doi:10.1371/journal.pmed.1002270 (2017).
- 26 7 Mullan, M. *et al.* A pathogenic mutation for probable Alzheimer's disease in the APP gene at  
27 the N-terminus of beta-amyloid. *Nat Genet* **1**, 345-347, doi:10.1038/ng0892-345 (1992).
- 28 8 Citron, M. *et al.* Mutation of the beta-amyloid precursor protein in familial Alzheimer's disease  
29 increases beta-protein production. *Nature* **360**, 672-674, doi:10.1038/360672a0 (1992).
- 30 9 De Strooper, B. *et al.* Deficiency of presenilin-1 inhibits the normal cleavage of amyloid  
31 precursor protein. *Nature* **391**, 387-390, doi:10.1038/34910 (1998).
- 32 10 Goate, A. *et al.* Segregation of a missense mutation in the amyloid precursor protein gene with  
33 familial Alzheimer's disease. *Nature* **349**, 704-706, doi:10.1038/349704a0 (1991).
- 34 11 Suzuki, N. *et al.* An increased percentage of long amyloid beta protein secreted by familial  
35 amyloid beta protein precursor (beta APP717) mutants. *Science* **264**, 1336-1340,  
36 doi:10.1126/science.8191290 (1994).
- 37 12 Hardy, J. A. & Higgins, G. A. Alzheimer's disease: the amyloid cascade hypothesis. *Science* **256**,  
38 184-185, doi:10.1126/science.1566067 (1992).
- 39 13 Kwart, D. *et al.* A Large Panel of Isogenic APP and PSEN1 Mutant Human iPSC Neurons Reveals  
40 Shared Endosomal Abnormalities Mediated by APP beta-CTFs, Not Abeta. *Neuron* **104**, 256-  
41 270 e255, doi:10.1016/j.neuron.2019.07.010 (2019).
- 42 14 Lorenzen, A. *et al.* Rapid and direct transport of cell surface APP to the lysosome defines a  
43 novel selective pathway. *Mol Brain* **3**, 11, doi:10.1186/1756-6606-3-11 (2010).
- 44 15 Koo, E. H. *et al.* Precursor of amyloid protein in Alzheimer disease undergoes fast anterograde  
45 axonal transport. *Proc Natl Acad Sci U S A* **87**, 1561-1565, doi:10.1073/pnas.87.4.1561 (1990).

- 1 16 Bhattacharyya, R. *et al.* Axonal generation of amyloid-beta from palmitoylated APP in  
2 mitochondria-associated endoplasmic reticulum membranes. *Cell Rep* **35**, 109134,  
3 doi:10.1016/j.celrep.2021.109134 (2021).
- 4 17 Lazarov, O. *et al.* Axonal transport, amyloid precursor protein, kinesin-1, and the processing  
5 apparatus: revisited. *J Neurosci* **25**, 2386-2395, doi:10.1523/JNEUROSCI.3089-04.2005 (2005).
- 6 18 Das, U. *et al.* Visualizing APP and BACE-1 approximation in neurons yields insight into the  
7 amyloidogenic pathway. *Nat Neurosci* **19**, 55-64, doi:10.1038/nn.4188 (2016).
- 8 19 Kamal, A., Almenar-Queralt, A., LeBlanc, J. F., Roberts, E. A. & Goldstein, L. S. Kinesin-mediated  
9 axonal transport of a membrane compartment containing beta-secretase and presenilin-1  
10 requires APP. *Nature* **414**, 643-648, doi:10.1038/414643a (2001).
- 11 20 Kamal, A., Stokin, G. B., Yang, Z., Xia, C. H. & Goldstein, L. S. Axonal transport of amyloid  
12 precursor protein is mediated by direct binding to the kinesin light chain subunit of kinesin-I.  
13 *Neuron* **28**, 449-459, doi:10.1016/s0896-6273(00)00124-0 (2000).
- 14 21 Szodorai, A. *et al.* APP anterograde transport requires Rab3A GTPase activity for assembly of  
15 the transport vesicle. *J Neurosci* **29**, 14534-14544, doi:10.1523/JNEUROSCI.1546-09.2009  
16 (2009).
- 17 22 Gunawardena, S. & Goldstein, L. S. Disruption of axonal transport and neuronal viability by  
18 amyloid precursor protein mutations in *Drosophila*. *Neuron* **32**, 389-401, doi:10.1016/s0896-  
19 6273(01)00496-2 (2001).
- 20 23 Kimura, N., Imamura, O., Ono, F. & Terao, K. Aging attenuates dynactin-dynein interaction:  
21 down-regulation of dynein causes accumulation of endogenous tau and amyloid precursor  
22 protein in human neuroblastoma cells. *J Neurosci Res* **85**, 2909-2916, doi:10.1002/jnr.21408  
23 (2007).
- 24 24 Stokin, G. B. *et al.* Axonopathy and transport deficits early in the pathogenesis of Alzheimer's  
25 disease. *Science* **307**, 1282-1288, doi:10.1126/science.1105681 (2005).
- 26 25 Lazarov, O. *et al.* Impairments in fast axonal transport and motor neuron deficits in transgenic  
27 mice expressing familial Alzheimer's disease-linked mutant presenilin 1. *J Neurosci* **27**, 7011-  
28 7020, doi:10.1523/JNEUROSCI.4272-06.2007 (2007).
- 29 26 Salehi, A. *et al.* Increased App expression in a mouse model of Down's syndrome disrupts NGF  
30 transport and causes cholinergic neuron degeneration. *Neuron* **51**, 29-42,  
31 doi:10.1016/j.neuron.2006.05.022 (2006).
- 32 27 Rodrigues, E. M., Weissmiller, A. M. & Goldstein, L. S. Enhanced beta-secretase processing  
33 alters APP axonal transport and leads to axonal defects. *Hum Mol Genet* **21**, 4587-4601,  
34 doi:10.1093/hmg/dds297 (2012).
- 35 28 Pozo Devoto, V. M., Lacovich V., Feole M., Bhat P., Chovan J., Čarna M., Onyango I.G., Dragišić  
36 N., Süsserová M., Barrios-Llerena M.E., Stokin G.B. . Unraveling axonal mechanisms of  
37 traumatic brain injury. *bioRxiv* **2022.03.30.486433**, doi:10.1101/2022.03.30.486433 (2022).
- 38 29 Rajendran, L. *et al.* Alzheimer's disease beta-amyloid peptides are released in association with  
39 exosomes. *Proc Natl Acad Sci U S A* **103**, 11172-11177, doi:10.1073/pnas.0603838103 (2006).
- 40 30 Cataldo, A. M., Hamilton, D. J. & Nixon, R. A. Lysosomal abnormalities in degenerating neurons  
41 link neuronal compromise to senile plaque development in Alzheimer disease. *Brain Res* **640**,  
42 68-80, doi:10.1016/0006-8993(94)91858-9 (1994).
- 43 31 Stokin, G. B. *et al.* Amyloid precursor protein-induced axonopathies are independent of  
44 amyloid-beta peptides. *Hum Mol Genet* **17**, 3474-3486, doi:10.1093/hmg/ddn240 (2008).
- 45 32 Bearer, E. L. *et al.* Alterations of functional circuitry in aging brain and the impact of mutated  
46 APP expression. *Neurobiol Aging* **70**, 276-290, doi:10.1016/j.neurobiolaging.2018.06.018  
47 (2018).
- 48 33 Xu, W. *et al.* Amyloid precursor protein-mediated endocytic pathway disruption induces axonal  
49 dysfunction and neurodegeneration. *J Clin Invest* **126**, 1815-1833, doi:10.1172/JCI82409  
50 (2016).

- 1 34 Hoang, H. T., Schlager, M. A., Carter, A. P. & Bullock, S. L. DYNC1H1 mutations associated with  
2 neurological diseases compromise processivity of dynein-dynactin-cargo adaptor complexes.  
3 *Proc Natl Acad Sci U S A* **114**, E1597-E1606, doi:10.1073/pnas.1620141114 (2017).
- 4 35 Boecker, C. A., Goldsmith, J., Dou, D., Cajka, G. G. & Holzbaur, E. L. F. Increased LRRK2 kinase  
5 activity alters neuronal autophagy by disrupting the axonal transport of autophagosomes. *Curr*  
6 *Biol* **31**, 2140-2154 e2146, doi:10.1016/j.cub.2021.02.061 (2021).
- 7 36 Lie, P. P. Y. *et al.* Axonal transport of late endosomes and amphisomes is selectively modulated  
8 by local Ca(2+) efflux and disrupted by PSEN1 loss of function. *Sci Adv* **8**, eabj5716,  
9 doi:10.1126/sciadv.abj5716 (2022).
- 10 37 Jorda-Siquier, T. *et al.* APP accumulates with presynaptic proteins around amyloid plaques: A  
11 role for presynaptic mechanisms in Alzheimer's disease? *Alzheimers Dement*,  
12 doi:10.1002/alz.12546 (2022).
- 13 38 Stokin, G. B. & Goldstein, L. S. Linking molecular motors to Alzheimer's disease. *J Physiol Paris*  
14 **99**, 193-200, doi:10.1016/j.jphysparis.2005.12.085 (2006).
- 15 39 Lomoio, S. *et al.* Gga3 deletion and a GGA3 rare variant associated with late onset Alzheimer's  
16 disease trigger BACE1 accumulation in axonal swellings. *Sci Transl Med* **12**,  
17 doi:10.1126/scitranslmed.aba1871 (2020).
- 18 40 Lacovich, V. *et al.* Tau Isoforms Imbalance Impairs the Axonal Transport of the Amyloid  
19 Precursor Protein in Human Neurons. *J Neurosci* **37**, 58-69, doi:10.1523/JNEUROSCI.2305-  
20 16.2016 (2017).
- 21 41 Mellone, M. *et al.* Tau pathology is present in vivo and develops in vitro in sensory neurons  
22 from human P301S tau transgenic mice: a system for screening drugs against tauopathies. *J*  
23 *Neurosci* **33**, 18175-18189, doi:10.1523/JNEUROSCI.4933-12.2013 (2013).
- 24 42 Tesseur, I. *et al.* Prominent axonopathy and disruption of axonal transport in transgenic mice  
25 expressing human apolipoprotein E4 in neurons of brain and spinal cord. *Am J Pathol* **157**,  
26 1495-1510, doi:10.1016/S0002-9440(10)64788-8 (2000).
- 27 43 Hurd, D. D. & Saxton, W. M. Kinesin mutations cause motor neuron disease phenotypes by  
28 disrupting fast axonal transport in *Drosophila*. *Genetics* **144**, 1075-1085,  
29 doi:10.1093/genetics/144.3.1075 (1996).
- 30 44 Morotz, G. M. *et al.* Kinesin light chain-1 serine-460 phosphorylation is altered in Alzheimer's  
31 disease and regulates axonal transport and processing of the amyloid precursor protein. *Acta*  
32 *Neuropathol Commun* **7**, 200, doi:10.1186/s40478-019-0857-5 (2019).
- 33 45 Chen, X. Q., Das, U., Park, G. & Mobley, W. C. Normal levels of KIF5 but reduced KLC1 levels in  
34 both Alzheimer disease and Alzheimer disease in Down syndrome: evidence suggesting defects  
35 in anterograde transport. *Alzheimers Res Ther* **13**, 59, doi:10.1186/s13195-021-00796-6  
36 (2021).
- 37 46 Morel, M., Heraud, C., Nicaise, C., Suain, V. & Brion, J. P. Levels of kinesin light chain and dynein  
38 intermediate chain are reduced in the frontal cortex in Alzheimer's disease: implications for  
39 axoplasmic transport. *Acta Neuropathol* **123**, 71-84, doi:10.1007/s00401-011-0901-4 (2012).

40

41

42

43

44

45

1  
2  
3  
4  
5  
6  
7  
8  
9  
10  
11  
12  
13  
14  
15  
16  
17  
18  
19  
20  
21  
22  
23  
24  
25  
26  
27  
28  
29  
30

## FIGURES AND LEGENDS

### Fig.1 - APP axonal transport is impaired by FAD mutations

**a.** Representative image of pNFH and MAP2 immunostainings of human neurons cultured in ibidi multichannel (scale bar = 50 $\mu$ m).

**b.** Mean intensities of pNFH/MAP2 ratios in neurons (n=303 neurites from 3 biological replicates).

**c.** Schematic of the position retrieval approach used in ibidi multichannel; lower panel shows pictures of the same axon during live- (left) and post-imaging (right) stages; overlap between pNFH (+) and APP<sub>swe</sub>-tRFP (+) intensities (on the right, scale bar = 20  $\mu$ m).

**d.** Time frames of APP particles moving toward the axon terminal (light purple), cell body (green) or stationary (dark purple), each frame consists of live (above) and processed image (below) via semi-automated tracking (scale bar=20 $\mu$ m).

**e.** Number of tracks/100 $\mu$ m quantified using semi-automated tracking for both APP<sub>wt</sub> and APP<sub>swe</sub>; n=15 axons from 3 biological replicates.

**f.** Proportions of APP<sub>wt</sub> and APP<sub>swe</sub> moving in anterograde direction, retrograde direction or stationary; n=15 axons from 3 biological replicates.

**g.** Average velocities of anterogradely or retrogradely moving APP<sub>wt</sub> and APP<sub>swe</sub>; n>10 particles per condition from 3 biological replicates.

Data are mean $\pm$ s.e.m. (**e, f**) or 10-90 percentile's box-and-whiskers (**g**) (\*\*p<0.01, \*\*\*p<0.001). Statistical comparisons were performed using unpaired *t*-test (**e**), 2-way ANOVA followed by Šidák's multiple comparisons (**f**) and Mann-Whitney test (**g**).

### Fig.2 – Swedish FAD mutation increases reversions and pauses frequencies

- 1 **a.** Kymograph illustrating 2D trajectories (red=anterograde, green=retrograde,  
2 orange=stationary); dashed boxes showing the main axonal transport parameters based  
3 on the segmental analysis (scale bar=10 $\mu$ m).
- 4 **b.** Real-time movement of APP<sub>wt</sub> and APP<sub>swe</sub> in anterograde and retrograde direction or  
5 pausing; n>150 particles from 3 biological replicates.
- 6 **c.** Distances reached by APP<sub>wt</sub> and APP<sub>swe</sub> in anterograde or retrograde direction; n>45  
7 particles from 3 biological replicates.
- 8 **d.** Reversion frequencies/10s of APP<sub>wt</sub> and APP<sub>swe</sub>; n>150 particles from 3 biological  
9 replicates.
- 10 **e.** Pauses frequencies analysed for anterograde and retrograde tracks of APP<sub>wt</sub> and  
11 APP<sub>swe</sub>; n>45 particles from 3 biological replicates.
- 12 **f.** Cumulative frequency distribution of segmental velocities of APP<sub>wt</sub> and APP<sub>swe</sub> in  
13 anterograde and retrograde directions; n>400 segments from 3 biological replicates.  
14 10-90 percentile's box-and-whiskers (**b-e**) or cumulative frequency distributions (**f**,  
15 \*p<0.05, \*\*p<0.01, \*\*\*p<0.001). Statistical comparisons were performed using 2-way  
16 ANOVA followed by Šídák's multiple comparisons test (**b**), Mann-Whitney test (**c-e**), and  
17 Kolmogorov-Smirnov test (**f**).

18

### 19 **Fig.3 – Swedish mutation perturbs APP distribution along neuronal projections**

- 20 Representative images of APP<sub>wt</sub> (**a**) or APP<sub>swe</sub> (**b**) transduced mature human neurons  
21 stained against either GFP or tRFP and Tau (scale bar=100  $\mu$ m); zoom-in images for both  
22 cell bodies and distal projections (scale bar=1 $\mu$ m).
- 23 **c.** Mean intensity ratios of APP<sub>wt</sub> or APP<sub>swe</sub> signals in soma/projection; n $\geq$ 10 pictures from  
24 3 biological replicates.
- 25 **d.** Mean intensity ratios of Tau signals in soma/projection in the same ROIs as in (**c**); n $\geq$ 10  
26 pictures from 3 biological replicates.  
27 Mean $\pm$ s.e.m. (\*\*\*p<0.001). Statistical comparisons were performed using unpaired *t*-test.

28

### 29 **Fig.4 – Enhanced recruitment of Dynactin1 to the APP motor assemblies**

- 30 **a.** Representative images of GFP and tRFP IPs of APP<sub>wt</sub> or APP<sub>swe</sub> lysates with membranes  
31 blotted for APP, DCTN1, KLC1 and  $\beta$ III-tubulin (loading control).

- 1 **b.** Intensity ratios of DCTN1 or KLC1 levels relative to either APP<sub>wt</sub> or APP<sub>swe</sub>; n=8 (DCTN1  
2 co-IPs) and n=6 (KLC1 co-IPs).
- 3 **c.** Representative images of DCTN1 IP of APP<sub>wt</sub> or APP<sub>swe</sub> lysates with membranes blotted  
4 for APP and  $\beta$ III-tubulin (loading control).
- 5 **d.** Intensity ratios of APP levels relative to DCTN1; n=3 DCTN1 Ips.
- 6 **e.** A model showing the consequences of enhanced DCTN1 recruitment to the APP motor  
7 assemblies.
- 8 Mean $\pm$ s.e.m. (\*p<0.05, \*\*p<0.01). Statistical comparisons were performed using  
9 unpaired *t*-test.

10

### 11 **Fig.5 – Swedish mutation perturbs axonal transport of early endosomes**

- 12 **a.** Representative images of NT and APP<sub>swe</sub> transduced cultures stained with DAPI (blue),  
13 Rab5 (green), tRFP (red) and Tau (blue) showing different areas of Rab5+ puncta; violin  
14 plots showing puncta that are smaller or larger than 0.5  $\mu$ m<sup>2</sup>; n $\geq$ 9 cells from 3 biological  
15 replicates.
- 16 **b.** Real-time movement of Rab5+ particles in NT and APP<sub>swe</sub> transduced cultures moving  
17 in anterograde or retrograde direction or pausing; n $\geq$ 70 particles from 3 biological  
18 replicates.
- 19 **c.** Track lengths of Rab5+ particles in NT and APP<sub>swe</sub> transduced cultures; n $\geq$ 70 particles  
20 from 3 biological replicates.
- 21 **d.** Reversions frequencies of Rab5+ particles in NT and APP<sub>swe</sub> transduced cultures; n $\geq$ 70  
22 particles from 3 biological replicates.
- 23 **e.** Pauses frequencies for Rab5+ particles in NT and APP<sub>swe</sub> transduced cultures; n $\geq$ 70  
24 particles from 3 biological replicates.
- 25 **f.** Segmental velocities of anterograde and retrograde movement of Rab5+ particles in NT  
26 and APP<sub>swe</sub> transduced cultures; n>70 segments from 3 biological replicates.
- 27 **g.** Representative images of Rab5+ particles in NT and APP<sub>swe</sub> transduced cultures stained  
28 against Rab5 (green), tRFP (red) and Tau (blue) (scale bars= 5 $\mu$ m); densities of Rab5  
29 particles in distal neurites; n $\geq$ 9 cells from 3 biological replicates
- 30 0-100 percentile's violin plot (**a**) or 10-90 percentile's box-and-whiskers (**b, c, d, and f**).  
31 Mean $\pm$ s.e.m. (**e and g**) (\*p<0.05, \*\*p<0.01, \*\*\*p<0.001).



- 1 Statistical comparisons were performed using mixed-effect analysis with Šídák's multiple
- 2 comparisons test (**a**), Mann-Whitney test (**b, c, d, and f**) and unpaired *t*-test (**e and g**).

Figure1 - Feole and Stokin

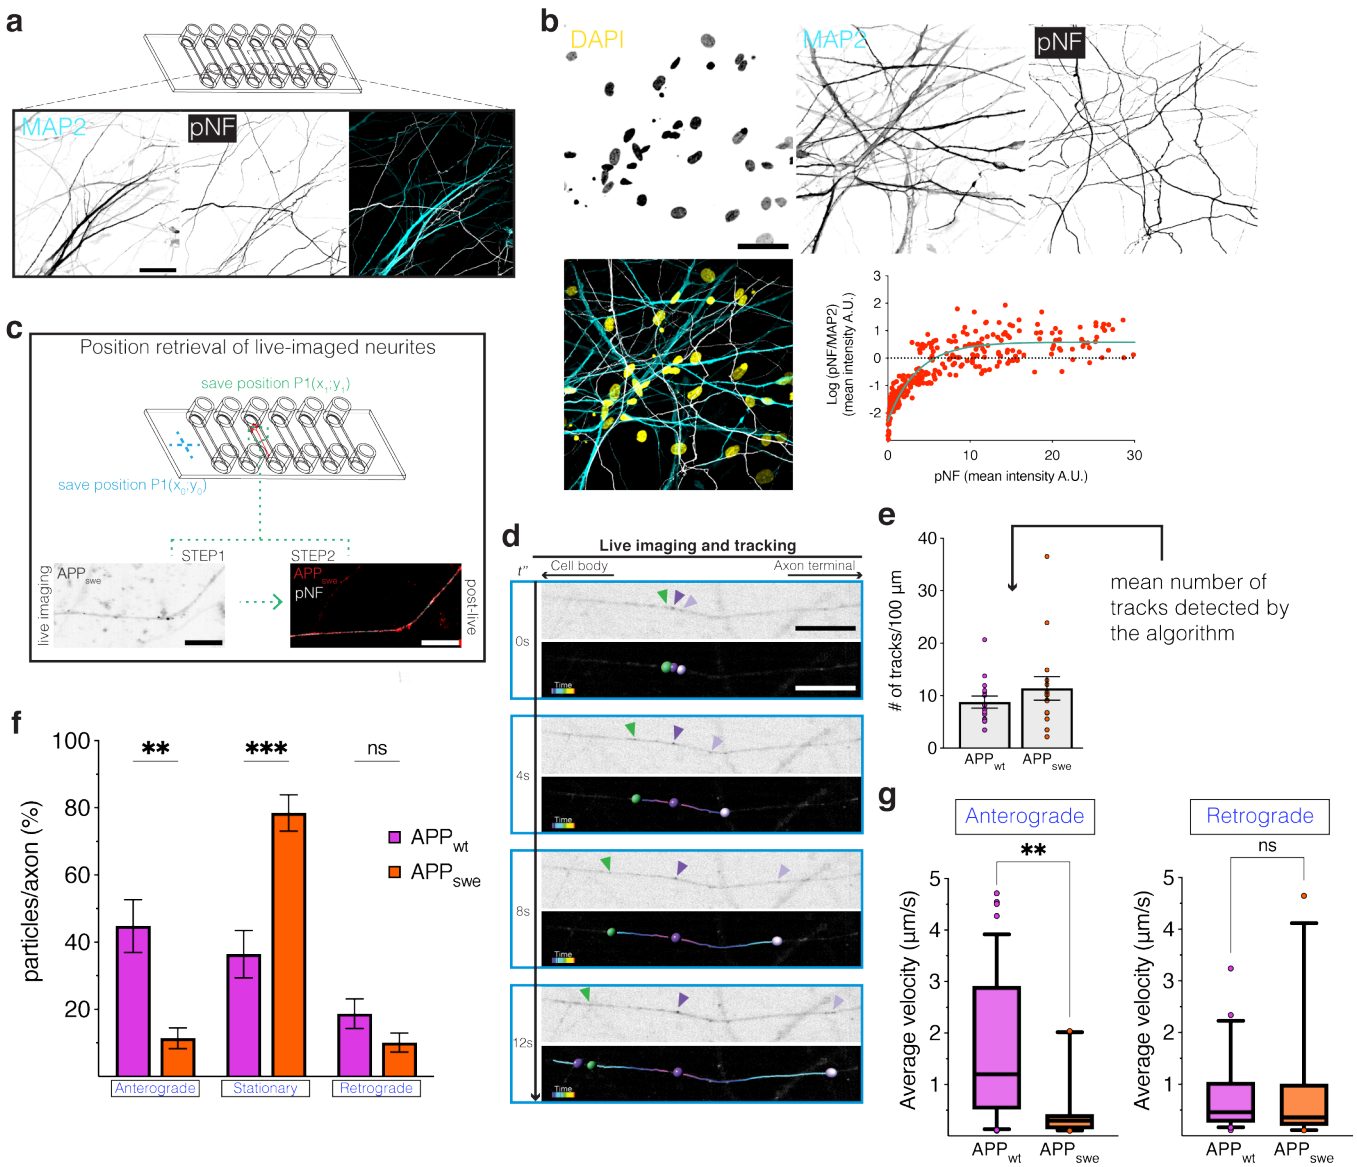

Figure 2 Feole and Stokin

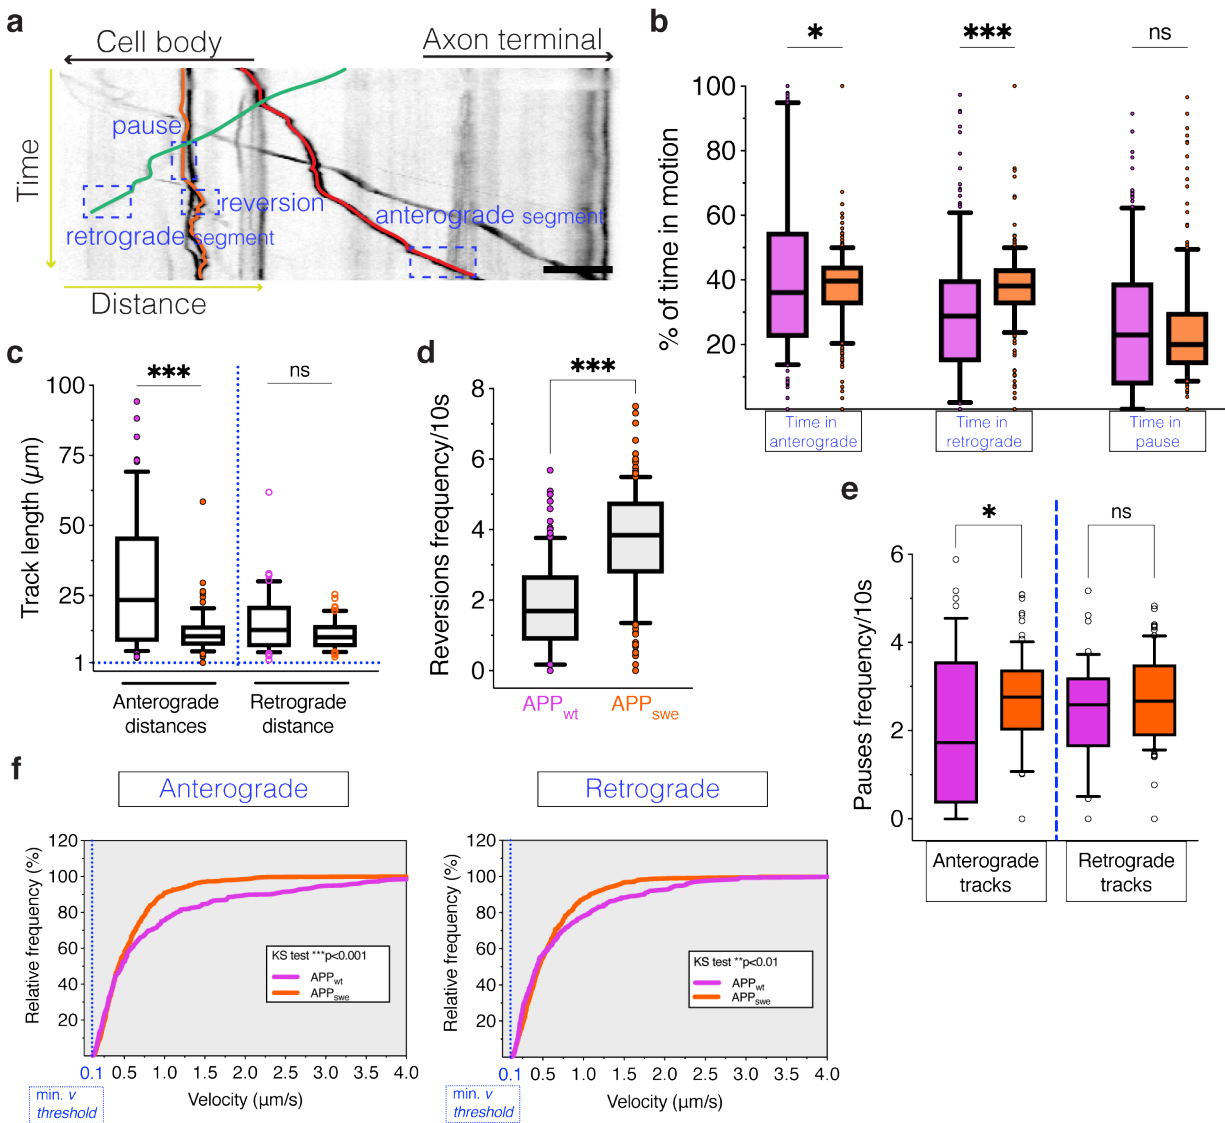

Figure 3 Feole and Stokin

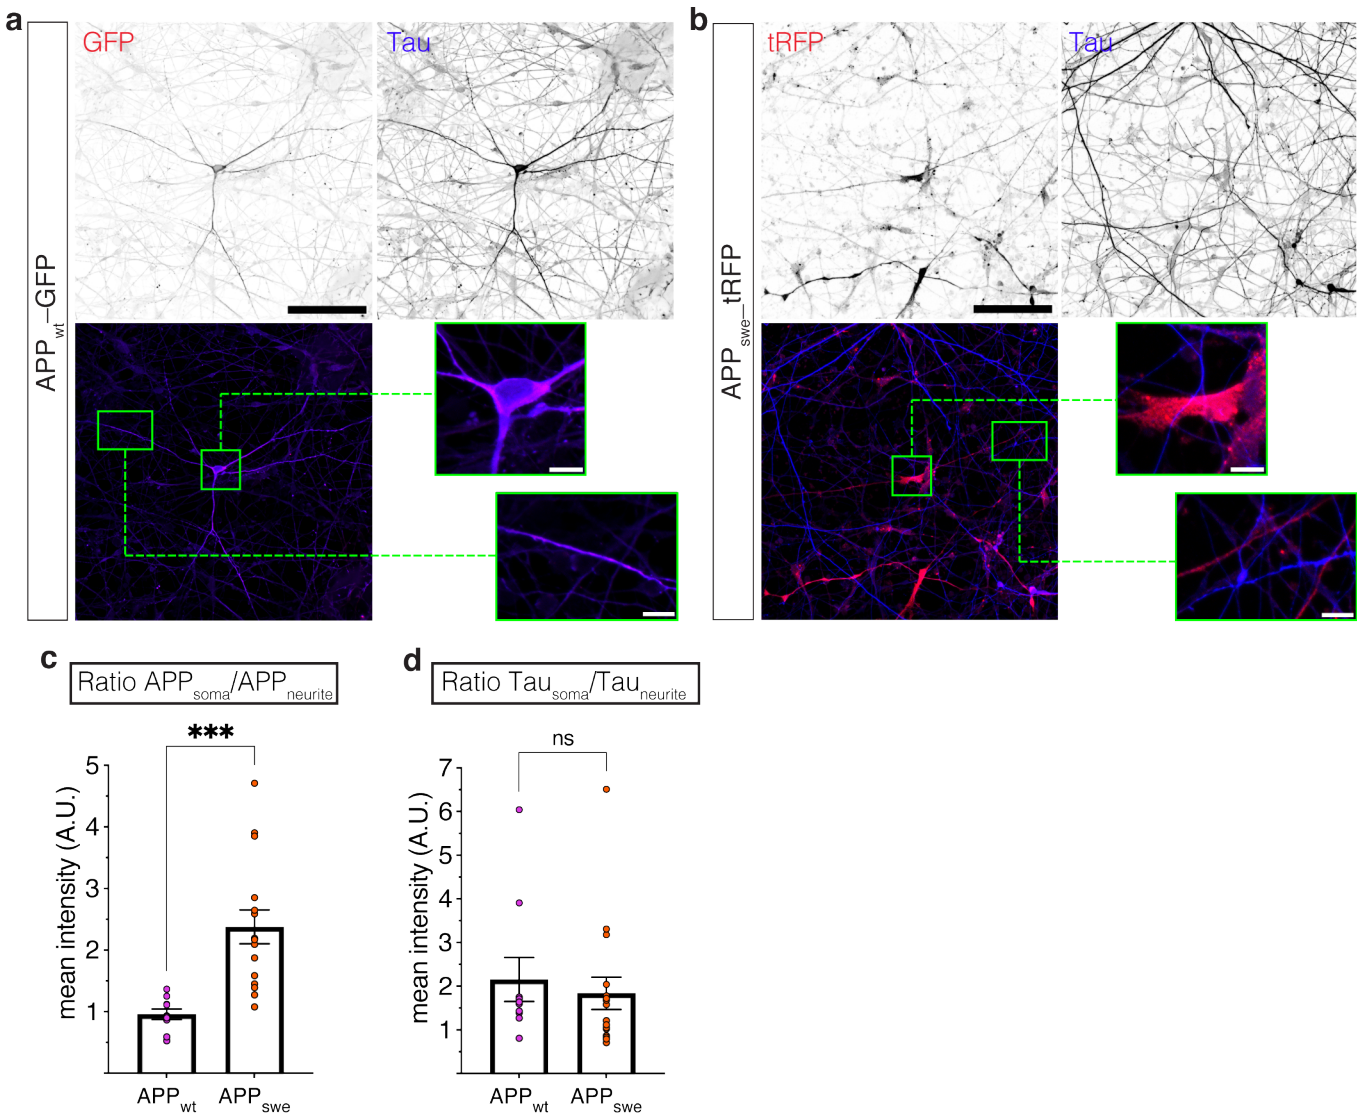

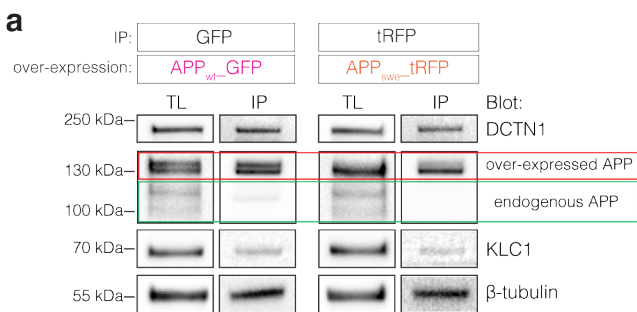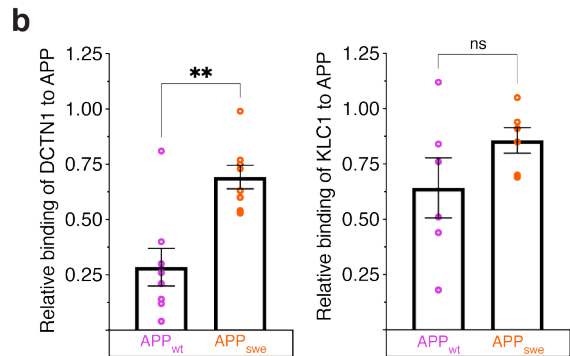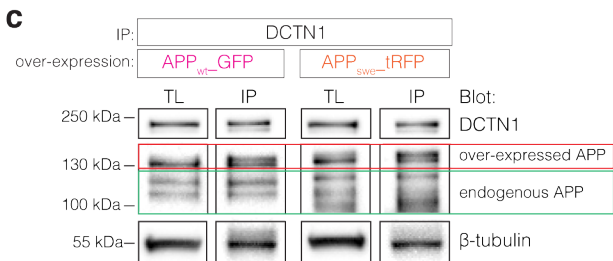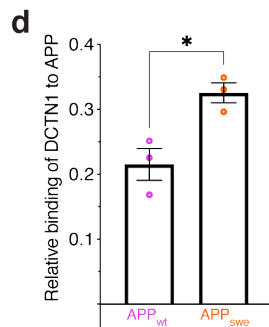

Figure 4 Feole and Stokin

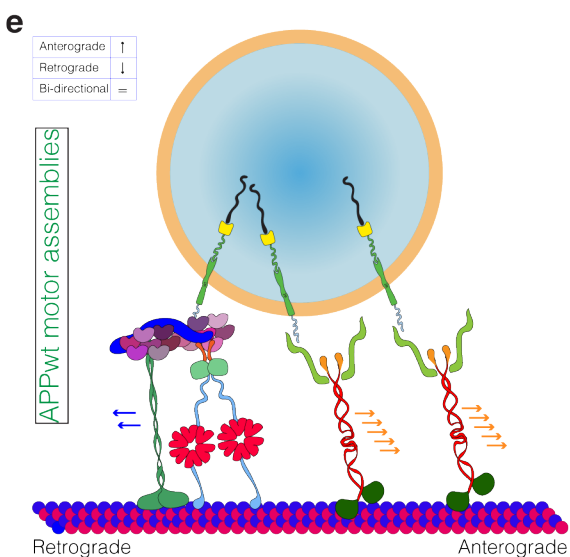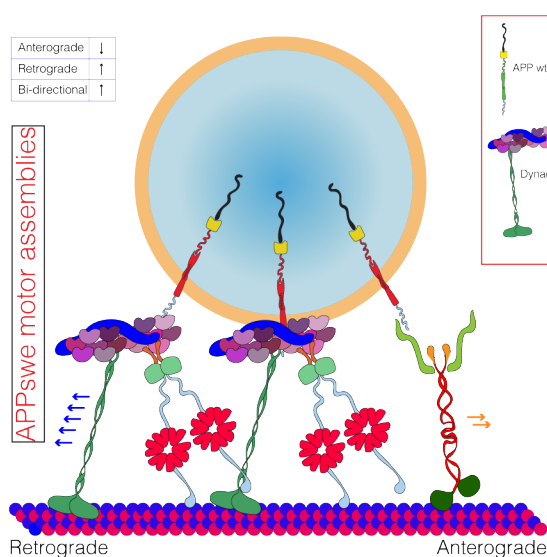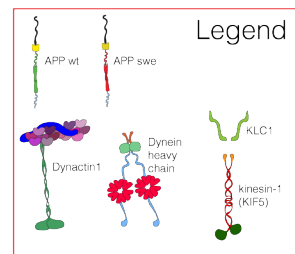

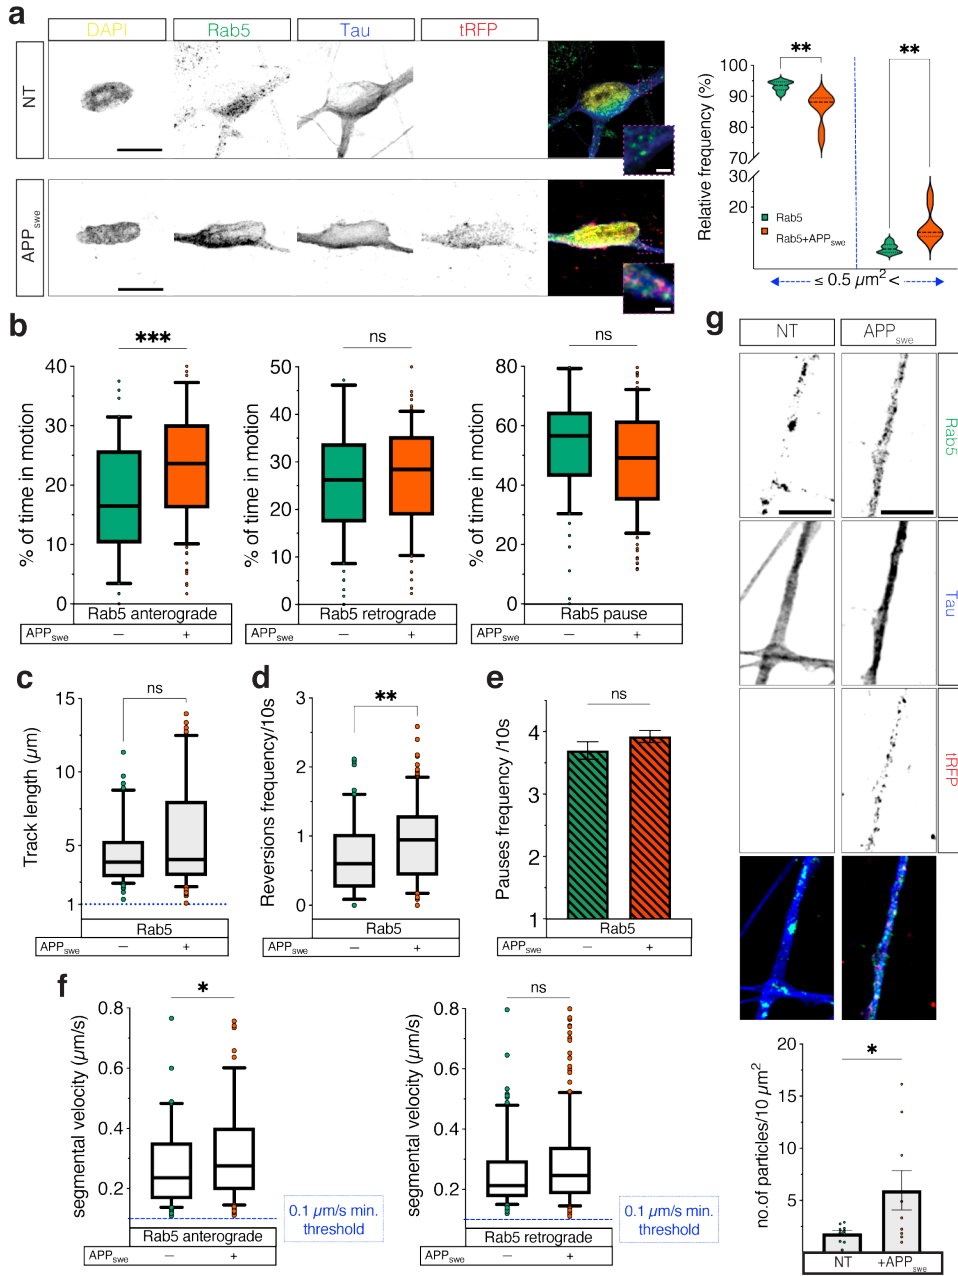

Source: https://www.biorxiv.org/content/10.1101/2022.11.17.516829v1.full.pdf
